# Supplementary material for: The Effect of Different Growth Stages of Black Chokeberry Fruits on Phytonutrients, Anti-Lipase Activity, and Antioxidant Capacity
Source: MDPI journal article supplement (doi:10.3390/molecules27228031), 2022-11-19
Supplement: s1 [file s1]

# The effect of different growth stages of black chokeberry fruits on phytonutrients, anti-lipase activity, and antioxidant capacity

Dorota Sosnowska<sup>1</sup>, Dominika Kajszczyk<sup>1</sup> and Anna Podsedek<sup>1\*</sup>

<sup>1</sup> Institute of Molecular and Industrial Biotechnology, Faculty of Biotechnology and Food Sciences, Lodz University of Technology, Stefanowskiego 2/22, 90-537 Łódź, Poland

\* Correspondence: anna.podsedek@p.lodz.pl

**Table S1.** Description of the selected maturity stages for collection of chokeberry fruit

| Harvesting date                      | 20 <sup>th</sup> of May                                                             | 20 <sup>th</sup> of June                                                            | 20 <sup>th</sup> of July                                                             | 20 <sup>th</sup> of August                                                            |
|--------------------------------------|-------------------------------------------------------------------------------------|-------------------------------------------------------------------------------------|--------------------------------------------------------------------------------------|---------------------------------------------------------------------------------------|
| Abbreviation                         | S1                                                                                  | S2                                                                                  | S3                                                                                   | S4                                                                                    |
| Maturity stage                       | unripe                                                                              | unripe                                                                              | semi-mature                                                                          | ripe                                                                                  |
| Fruit colour                         | green                                                                               | green                                                                               | purple                                                                               | black                                                                                 |
| Mass weight (g/100 fruits)           | 8.81 ± 0.26a                                                                        | 18.57 ± 0.87b                                                                       | 90.88 ± 3.50c                                                                        | 94.43 ± 4.78c                                                                         |
| Dry matter (g/100 g of fresh weight) | 24.83 ± 0.25b                                                                       | 34.42 ± 0.34c                                                                       | 23.23 ± 0.45a                                                                        | 22.65 ± 0.21a                                                                         |
| Fruits at various stages of maturity |  |  |  |  |
| Ground dried fruits                  |  |  |  |  |

Mean values within a row with different letters are significantly different at  $p < 0.05$

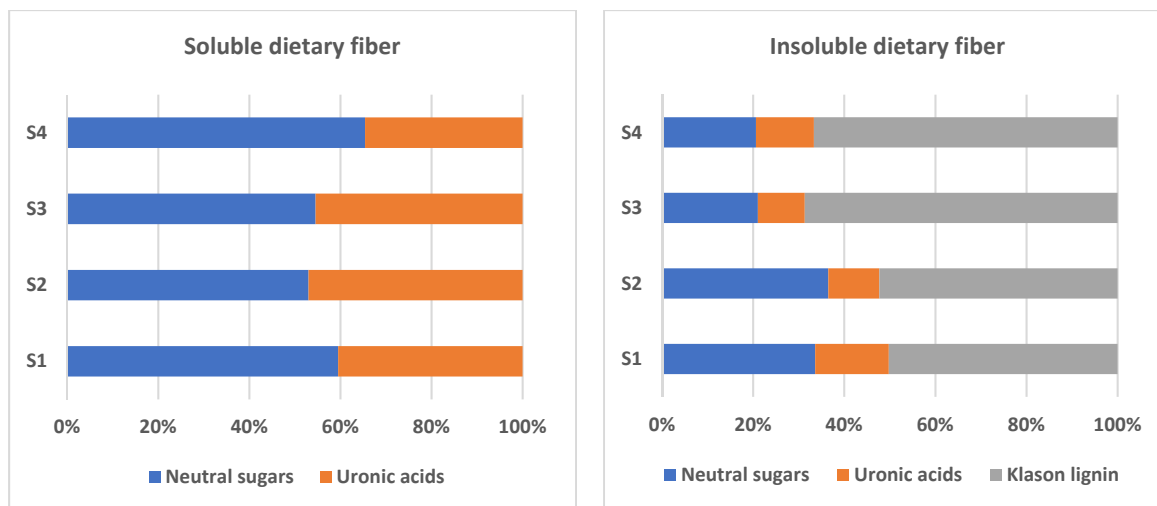

**Figure S1.** The percentage of soluble and insoluble fiber fraction in chokeberry fruit at various stages of development. S1 – unripe green fruits, harvest May 20; S2 – unripe green fruits, harvest June 20; S3 – semi- mature purple fruits, harvest July 20; S4 – ripe black fruits, harvest August 20.

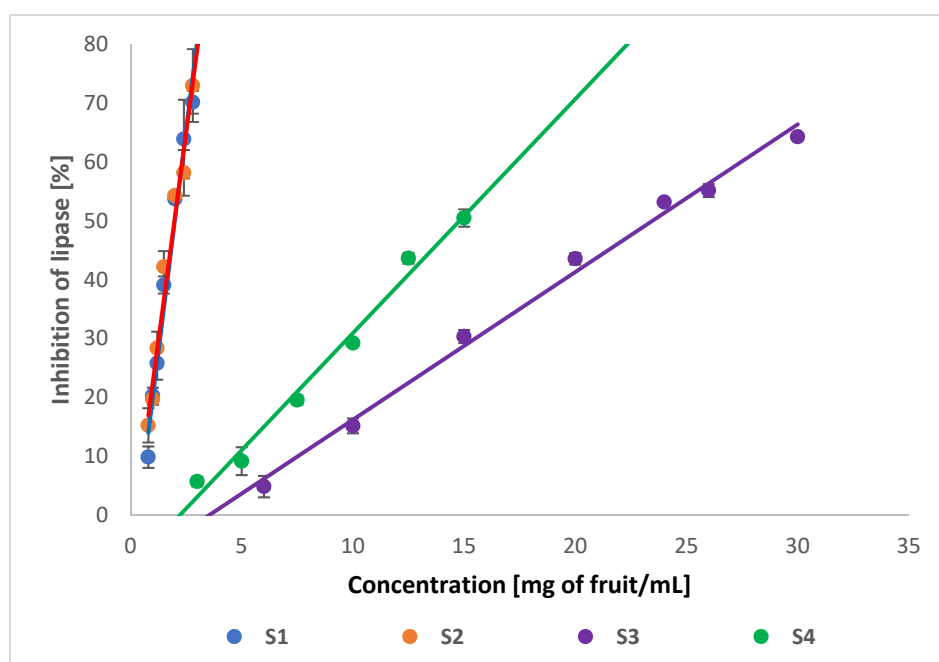

**Figure S2.** Effect of concentration of chokeberry fruits at various stages of development (S1 – S4) on the inhibition of pancreatic lipase. S1 – unripe green fruits, harvest May 20; S2 – unripe green fruits, harvest June 20; S3 – semi- mature purple fruits, harvest July 20; S4 – ripe black fruits, harvest August 20.

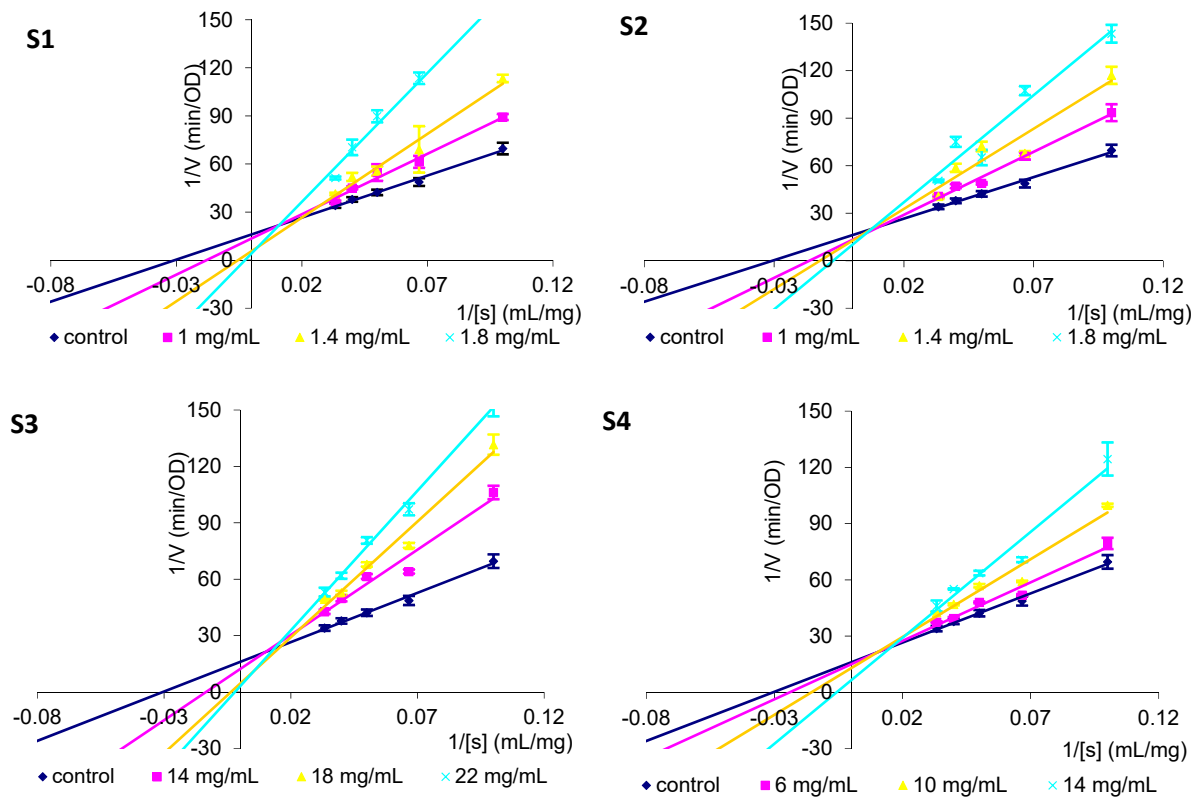

**Figure S3.** Lineweaver-Burk plots showing the impact of the control (without inhibitor) and chokeberry fruit at various stages of development (S1-S4) on the pancreatic lipase activity; S1 – unripe green fruits, harvest May 20; S2 – unripe green fruits, harvest June 20; S3 – semi- mature purple fruits, harvest July 20; S4 – ripe black fruits, harvest August 20.
